# Supplementary material
Source: PubMed Central journal article supplement (PMC4672818)
Supplement: pnas.1511468112.sd03.pdf [file pnas.1511468112.sd03.pdf]

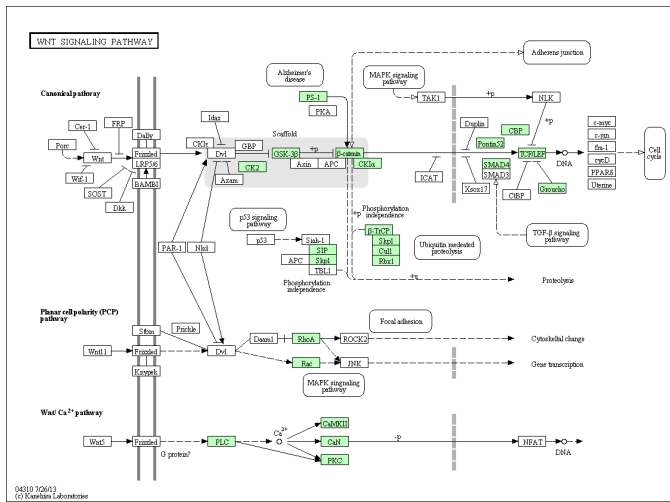

Wnt pathway components identified in the genome and transcriptome of *Kudoa iwatai* through assignment of KEGG orthology terms. Components identified in this species are highlighted in green.

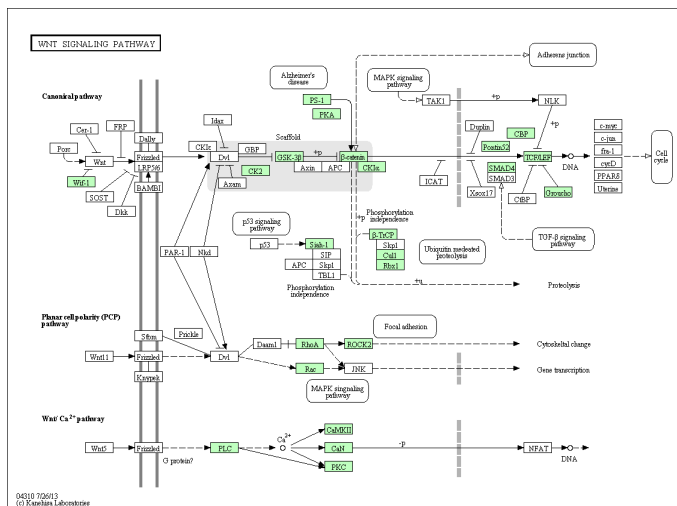

Wnt pathway components identified in the genome and transcriptome of *Myxobolus cerebralis* through assignment of KEGG orthology terms. Components identified in this species are highlighted in green.

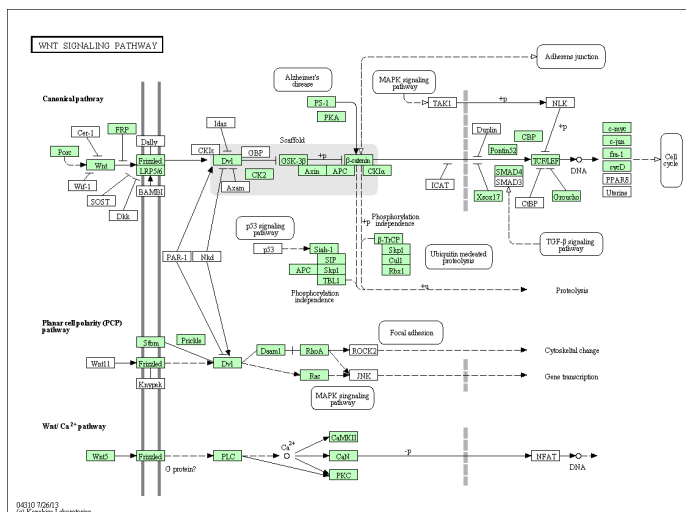

Wnt pathway components identified in the genome and transcriptome of *Polypodium hydriiforme* through assignment of KEGG orthology terms. Components identified in this species are highlighted in green.

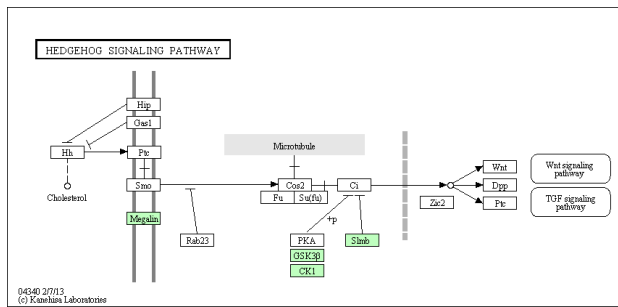

Hedgehog signaling pathway components identified in the genome and transcriptome of *Kudoa iwatai* through assignment of KEGG orthology terms. Components identified in this species are highlighted in green.

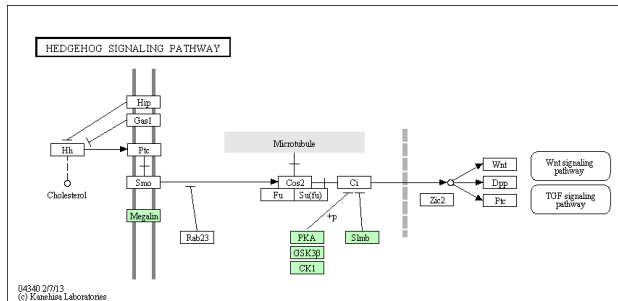

Hedgehog signaling pathway components identified in the genome and transcriptome of *Myxobolus cerebralis* through assignment of KEGG orthology terms. Components identified in this species are highlighted in green.

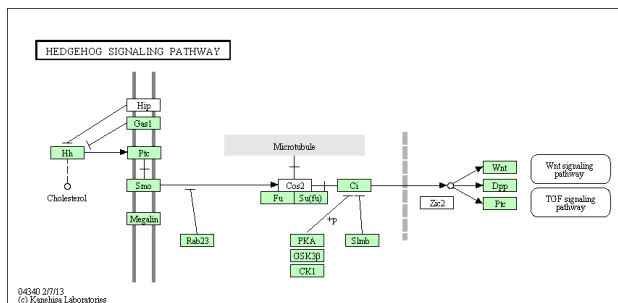

Hedgehog signaling pathway components identified in the genome and transcriptome of *Polypodium hydriforme* through assignment of KEGG orthology terms. Components identified in this species are highlighted in green.

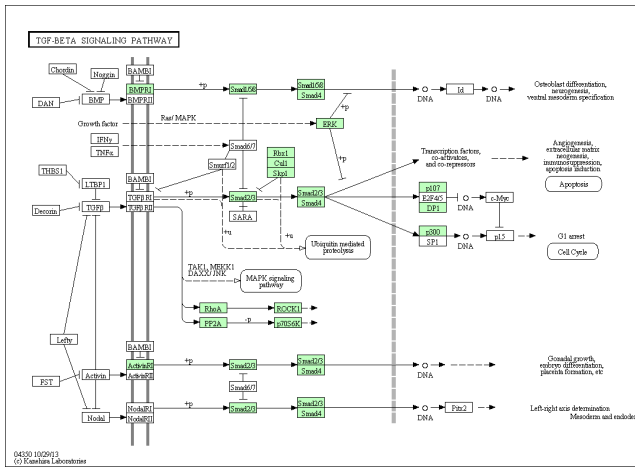

TGF- $\beta$  signaling pathway components identified in the genome and transcriptome of *Kudoa iwatai* through assignment of KEGG orthology terms. Components identified in this species are highlighted in green.

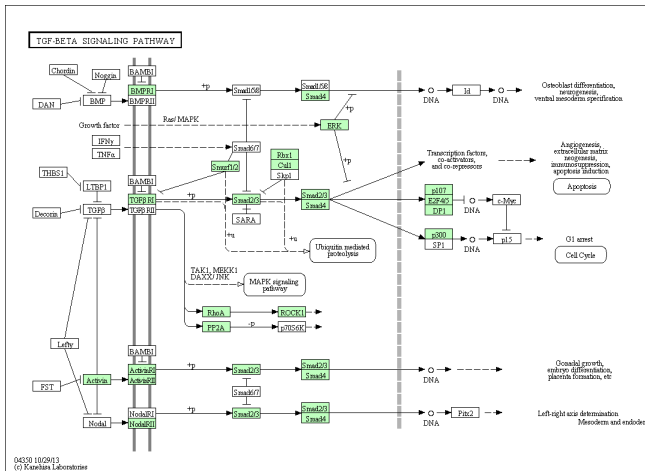

TGF- $\beta$  signaling pathway components identified in the genome and transcriptome of *Myxobolus cerebralis* through assignment of KEGG orthology terms. Components identified in this species are highlighted in green.

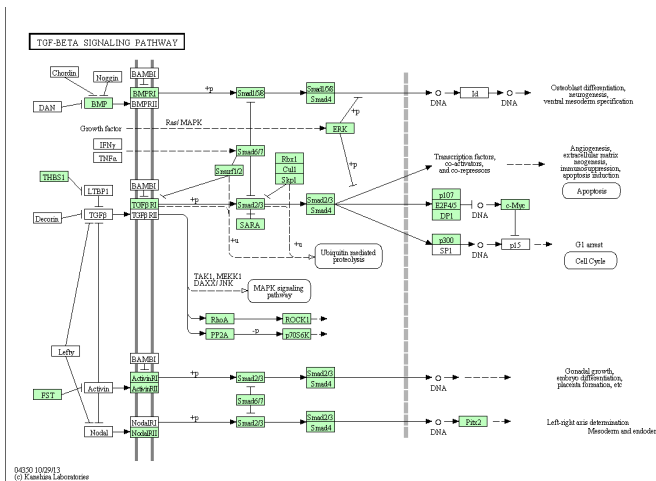

TGF- $\beta$  signaling pathway components identified in the genome and transcriptome of *Polypodium hydriforme* through assignment of KEGG orthology terms. Components identified in this species are highlighted in green.

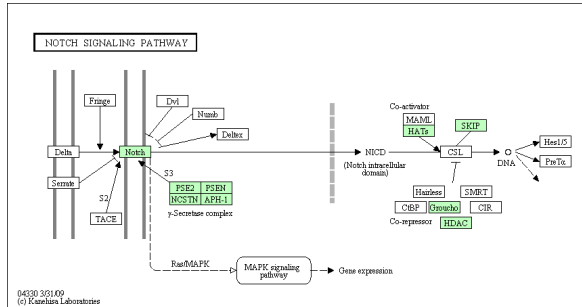

Notch signaling pathway components identified in the genome and transcriptome of *Kudoa iwatai* through assignment of KEGG orthology terms. Components identified in this species are highlighted in green.

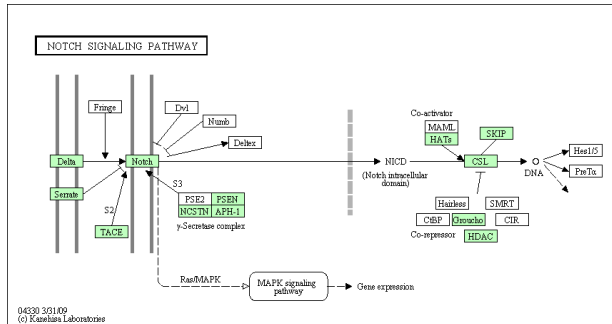

Notch signaling pathway components identified in the genome and transcriptome of *Myxobolus cerebralis* through assignment of KEGG orthology terms. Components identified in this species are highlighted in green.

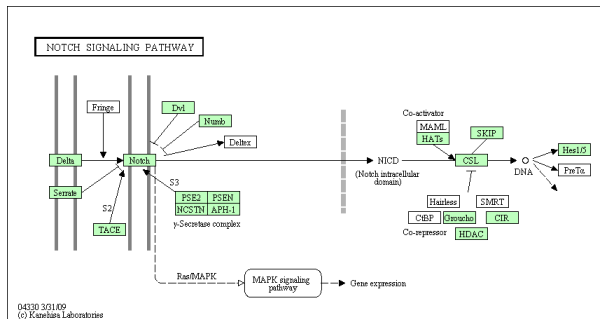

Notch signaling pathway components identified in the genome and transcriptome of *Myxobolus cerebralis* through assignment of KEGG orthology terms. Components identified in this species are highlighted in green.
